# Supplementary material for: SL-Cloud: A Computational Resource to Support Synthetic Lethal Interaction Discovery
Source: bioRxiv or medRxiv preprint supplement (doi:10.1101/2021.09.18.459450), 2021-09-19
Supplement: Supplementary file [file media-2.pdf]

**Table S2.** Pathways enriched by synthetic lethal partners of DDR genes

| Pathway id | Pathway                                                        | DAISY | MDSLP-CR | MDSLP-shf | CGI   |
|------------|----------------------------------------------------------------|-------|----------|-----------|-------|
| KEGG:00310 | Lysine degradation                                             | 0.046 |          |           |       |
| KEGG:00970 | Aminoacyl-tRNA biosynthesis                                    |       | 0.001    |           |       |
| KEGG:01522 | Endocrine resistance                                           | 0.014 |          |           |       |
| KEGG:03010 | Ribosome                                                       |       | 0.000    |           |       |
| KEGG:03013 | RNA transport                                                  | 0.001 |          |           |       |
| KEGG:03015 | mRNA surveillance pathway                                      | 0.000 |          |           |       |
| KEGG:03022 | Basal transcription factors                                    | 0.038 |          |           |       |
| KEGG:03040 | Spliceosome                                                    | 0.000 |          | 0.000     | 0.001 |
| KEGG:04010 | MAPK signaling pathway                                         |       |          |           | 0.045 |
| KEGG:04068 | FoxO signaling pathway                                         | 0.020 |          |           |       |
| KEGG:04110 | Cell cycle                                                     | 0.000 |          | 0.012     |       |
| KEGG:04114 | Oocyte meiosis                                                 | 0.005 |          |           |       |
| KEGG:04141 | Protein processing in endoplasmic reticulum                    |       |          |           | 0.002 |
| KEGG:04144 | Endocytosis                                                    |       |          |           | 0.000 |
| KEGG:04213 | Longevity regulating pathway - multiple species                |       |          |           | 0.000 |
| KEGG:04218 | Cellular senescence                                            | 0.000 |          |           |       |
| KEGG:04612 | Antigen processing and presentation                            |       |          |           | 0.000 |
| KEGG:04714 | Thermogenesis                                                  |       | 0.003    |           |       |
| KEGG:04914 | Progesterone-mediated oocyte maturation                        | 0.000 |          |           |       |
| KEGG:04915 | Estrogen signaling pathway                                     |       |          |           | 0.001 |
| KEGG:04932 | Non-alcoholic fatty liver disease                              |       | 0.009    |           |       |
| KEGG:05020 | Prion disease                                                  |       |          |           | 0.030 |
| KEGG:05134 | Legionellosis                                                  |       |          |           | 0.000 |
| KEGG:05145 | Toxoplasmosis                                                  |       |          |           | 0.000 |
| KEGG:05161 | Hepatitis B                                                    | 0.000 |          |           |       |
| KEGG:05162 | Measles                                                        |       |          |           | 0.001 |
| KEGG:05166 | Human T-cell leukemia virus 1 infection                        | 0.000 |          | 0.002     |       |
| KEGG:05167 | Kaposi sarcoma-associated herpesvirus infection                | 0.024 |          |           |       |
| KEGG:05169 | Epstein-Barr virus infection                                   | 0.002 |          |           |       |
| KEGG:05170 | Human immunodeficiency virus 1 infection                       | 0.013 |          |           |       |
| KEGG:05203 | Viral carcinogenesis                                           | 0.018 |          |           |       |
| KEGG:05211 | Renal cell carcinoma                                           | 0.005 |          |           |       |
| KEGG:05215 | Prostate cancer                                                | 0.000 |          |           |       |
| KEGG:05220 | Chronic myeloid leukemia                                       | 0.004 |          |           |       |
| KEGG:05222 | Small cell lung cancer                                         | 0.035 |          |           |       |
| KEGG:05223 | Non-small cell lung cancer                                     | 0.040 |          |           |       |
| KEGG:05417 | Lipid and atherosclerosis                                      |       |          |           | 0.008 |
| REAC:R-HSA | E2F-enabled inhibition of pre-replication complex f            | 0.048 |          |           |       |
| REAC:R-HSA | E2F mediated regulation of DNA replication                     | 0.002 |          |           |       |
| REAC:R-HSA | Transcription of E2F targets under negative contro             | 0.046 |          |           |       |
| REAC:R-HSA | Transcription of E2F targets under negative contro             | 0.012 |          |           |       |
| REAC:R-HSA | Amplification of signal from the kinetochores                  | 0.000 |          |           |       |
| REAC:R-HSA | Amplification of signal from unattached kinetocho              | 0.000 |          |           |       |
| REAC:R-HSA | The citric acid (TCA) cycle and respiratory electron transport |       | 0.000    |           |       |

|            |                                                               |       |       |       |       |
|------------|---------------------------------------------------------------|-------|-------|-------|-------|
| REAC:R-HSA | G0 and Early G1                                               | 0.000 |       |       |       |
| REAC:R-HSA | Polo-like kinase mediated events                              | 0.000 |       |       |       |
| REAC:R-HSA | Transport of Mature mRNA derived from an Intron               | 0.000 |       |       |       |
| REAC:R-HSA | Respiratory electron transport, ATP synthesis by chemiosmotic |       | 0.001 |       |       |
| REAC:R-HSA | Cell Cycle                                                    | 0.000 |       |       | 0.002 |
| REAC:R-HSA | APC/C-mediated degradation of cell cycle proteins             | 0.012 |       |       |       |
| REAC:R-HSA | Activation of ATR in response to replication stress           | 0.001 |       |       |       |
| REAC:R-HSA | Unwinding of DNA                                              | 0.001 |       |       |       |
| REAC:R-HSA | RHO GTPase Effectors                                          | 0.003 |       |       |       |
| REAC:R-HSA | Generic Transcription Pathway                                 | 0.000 |       |       |       |
| REAC:R-HSA | Separation of Sister Chromatids                               | 0.000 |       |       |       |
| REAC:R-HSA | Resolution of Sister Chromatid Cohesion                       | 0.000 |       |       |       |
| REAC:R-HSA | Mitotic Metaphase and Anaphase                                | 0.000 |       |       |       |
| REAC:R-HSA | SUMOylation                                                   | 0.002 |       |       |       |
| REAC:R-HSA | SUMO E3 ligases SUMOylate target proteins                     | 0.003 |       |       |       |
| REAC:R-HSA | PKMTs methylate histone lysines                               | 0.050 |       |       |       |
| REAC:R-HSA | HDMs demethylate histones                                     |       |       |       | 0.000 |
| REAC:R-HSA | Chromatin modifying enzymes                                   | 0.000 |       |       | 0.003 |
| REAC:R-HSA | Regulation of HSF1-mediated heat shock response               |       |       |       | 0.000 |
| REAC:R-HSA | HSP90 chaperone cycle for steroid hormone receptors (SHR      |       |       |       | 0.001 |
| REAC:R-HSA | Cellular response to heat stress                              |       |       |       | 0.000 |
| REAC:R-HSA | Attenuation phase                                             |       |       |       | 0.000 |
| REAC:R-HSA | HSF1-dependent transactivation                                |       |       |       | 0.000 |
| REAC:R-HSA | Transcriptional Regulation by TP53                            | 0.000 | 0.001 |       |       |
| REAC:R-HSA | tRNA Aminoacylation                                           |       | 0.008 |       |       |
| REAC:R-HSA | Mitochondrial tRNA aminoacylation                             |       | 0.000 |       |       |
| REAC:R-HSA | Mitotic G2-G2/M phases                                        | 0.000 |       |       |       |
| REAC:R-HSA | Regulation of mitotic cell cycle                              | 0.012 |       |       |       |
| REAC:R-HSA | Mitotic G1 phase and G1/S transition                          | 0.000 |       |       |       |
| REAC:R-HSA | Chromatin organization                                        | 0.000 |       |       | 0.003 |
| REAC:R-HSA | Mitochondrial translation initiation                          |       | 0.000 |       |       |
| REAC:R-HSA | Mitochondrial translation                                     |       | 0.000 |       |       |
| REAC:R-HSA | Mitochondrial translation elongation                          |       | 0.000 |       |       |
| REAC:R-HSA | Mitochondrial translation termination                         |       | 0.000 |       |       |
| REAC:R-HSA | TP53 Regulates Metabolic Genes                                |       | 0.000 |       |       |
| REAC:R-HSA | Regulation of TP53 Activity                                   | 0.000 |       |       |       |
| REAC:R-HSA | RHO GTPases Activate Formins                                  | 0.000 |       |       |       |
| REAC:R-HSA | HDR through Single Strand Annealing (SSA                      |       |       | 0.045 |       |
| REAC:R-HSA | Respiratory electron transport                                |       | 0.000 |       |       |
| REAC:R-HSA | TP53 Regulates Transcription of Cell Cycle Genes              | 0.000 |       |       |       |
| REAC:R-HSA | Regulation of TP53 Activity through Acetylation               | 0.029 |       |       |       |
| REAC:R-HSA | PTEN Regulation                                               | 0.006 |       |       |       |
| REAC:R-HSA | CDC6 association with the ORC:origin complex                  | 0.000 |       |       |       |
| REAC:R-HSA | Assembly of the pre-replicative complex                       | 0.000 |       |       |       |
| REAC:R-HSA | Mitotic Prometaphase                                          | 0.000 |       |       |       |

|            |                                                       |       |       |       |       |
|------------|-------------------------------------------------------|-------|-------|-------|-------|
| REAC:R-HSA | Mitotic Anaphase                                      | 0.000 |       |       |       |
| REAC:R-HSA | Mitotic Telophase/Cytokinesis                         | 0.002 |       |       |       |
| REAC:R-HSA | M Phase                                               | 0.000 |       |       |       |
| REAC:R-HSA | Orc1 removal from chromatin                           | 0.001 |       |       |       |
| REAC:R-HSA | Activation of the pre-replicative complex             | 0.000 |       |       |       |
| REAC:R-HSA | DNA Replication Pre-Initiation                        | 0.000 |       |       |       |
| REAC:R-HSA | Switching of origins to a post-replicative state      | 0.000 |       |       |       |
| REAC:R-HSA | DNA strand elongation                                 | 0.000 |       |       |       |
| REAC:R-HSA | Cyclin E associated events during G1/S transition     | 0.021 |       |       |       |
| REAC:R-HSA | G1/S-Specific Transcription                           | 0.000 |       |       |       |
| REAC:R-HSA | G1/S Transition                                       | 0.000 |       |       |       |
| REAC:R-HSA | Synthesis of DNA                                      | 0.000 |       |       |       |
| REAC:R-HSA | S Phase                                               | 0.000 |       |       |       |
| REAC:R-HSA | G2/M Transition                                       | 0.000 |       |       |       |
| REAC:R-HSA | Cell Cycle, Mitotic                                   | 0.000 |       |       |       |
| REAC:R-HSA | DNA Replication                                       | 0.000 |       |       |       |
| REAC:R-HSA | G2/M Checkpoints                                      |       |       |       | 0.014 |
| REAC:R-HSA | Mitotic Spindle Checkpoint                            | 0.000 |       |       |       |
| REAC:R-HSA | Cell Cycle Checkpoints                                | 0.000 |       | 0.034 | 0.037 |
| REAC:R-HSA | Cyclin A:Cdk2-associated events at S phase entry      | 0.029 |       |       |       |
| REAC:R-HSA | mRNA Splicing - Major Pathway                         | 0.000 |       | 0.000 |       |
| REAC:R-HSA | mRNA Splicing - Minor Pathway                         |       |       | 0.001 |       |
| REAC:R-HSA | mRNA Splicing                                         | 0.000 |       | 0.000 |       |
| REAC:R-HSA | mRNA 3'-end processing                                | 0.000 |       |       |       |
| REAC:R-HSA | Transport of Mature Transcript to Cytoplasm           | 0.000 |       |       |       |
| REAC:R-HSA | Processing of Capped Intron-Containing Pre-mRN        | 0.000 |       | 0.000 |       |
| REAC:R-HSA | Translation                                           |       | 0.000 |       |       |
| REAC:R-HSA | RNA Polymerase II Transcription Termination           | 0.000 |       |       |       |
| REAC:R-HSA | RNA Polymerase II Transcription                       | 0.000 |       |       |       |
| REAC:R-HSA | Chromosome Maintenance                                | 0.007 |       |       |       |
| REAC:R-HSA | Gene expression (Transcription                        | 0.000 |       |       |       |
| REAC:R-HSA | ESR-mediated signaling                                | 0.037 |       |       |       |
| REAC:R-HSA | Metabolism of RNA                                     | 0.000 |       | 0.000 |       |
| REAC:R-HSA | EML4 and NUDC in mitotic spindle formation            | 0.000 |       |       |       |
| REAC:R-HSA | Aberrant regulation of mitotic G1/S transition in car | 0.020 |       |       |       |
| REAC:R-HSA | Defective binding of RB1 mutants to E2F1,(E2F2,       | 0.020 |       |       |       |
| REAC:R-HSA | Diseases of mitotic cell cycle                        | 0.039 |       |       |       |
| REAC:R-HSA | Aberrant regulation of mitotic cell cycle due to RB1  | 0.024 |       |       |       |
